# Supplementary material for: Identification of Bunyamwera and Possible Other Orthobunyavirus Infections and Disease in Cattle during a Rift Valley Fever Outbreak in Rwanda in 2018
Source: PubMed Central journal article supplement (PMC7356447; doi:10.4269/ajtmh.19-0596), 2020-04-20
Supplement: tpmd190596.SD1.pdf [file tpmd190596.SD1.pdf]

## Supplemental Information

**Table S1:** RT-PCR Primers and sequencing primers

| Virus and segment targeted | Primers        | Primer sequence                      | Amplicon size |
|----------------------------|----------------|--------------------------------------|---------------|
| BUNV-S                     | Forward primer | 5'-CTT CCC AGG ATC AGA GAT GTT-3'    | 395bp         |
|                            | Reverse primer | 5'-ATT TAG CCC GCT GTC TTT CT-3'     |               |
| BUNV- M                    | Forward primer | 5'-GCT TAT GGA TGG GCG TAC AA-3'     | 651bp         |
|                            | Reverse primer | 5'-GAT GCC TCT GAC CCA GTT AAT-3'    |               |
| BUNV- L                    | Forward primer | 5'-AAT CCA GAG GCC CTA GGT ATA A-3'  | 767bp         |
|                            | Reverse primer | 5'-GAC CAA GGC TCT TGC TCT ATC- 3'   |               |
| BATV-S                     | Forward primer | 5'-GAC CCA GAG GTT GCA TAC ATT A-3'  | 394bp         |
|                            | Reverse primer | 5'-CAG ACC CTG GAA AGA ATG AGA G-3'  |               |
| BATV- M                    | Forward primer | 5'-GAA CTA ATC CCT GCC TCA CAA G-3'  | 847bp         |
|                            | Reverse primer | 5'-GAC ACT CTC CTC AAC TGC TTT-3'    |               |
| BATV-L                     | Forward primer | 5'- TGT ATC ATC ACC CGG CTT ATT C-3' | 798bp         |
|                            | Reverse primer | 5'-CAG AGG GTT TGA CAG CCT ATA TT-3' |               |
| NRIV-S                     | Forward primer | 5'-TGC TAA CAC CAG TAC TTT-3'        | 504bp         |
|                            | Reverse primer | 5'-ACC TCT GTC GCA TTG TCT TT- 3'    |               |
| NRIV-M                     | Forward primer | 5'-TGG GTG CCT TGC TGT AAA TA - 3'   | 914bp         |
|                            | Reverse primer | 5'-CAC TGA TCC CTT CAT CCC TAA C- 3' |               |
| NRIV-L                     | Forward primer | 5'-AGC CAG CAC TAC AAG ATT AGA- 3'   | 785bp         |
|                            | Reverse primer | 5'-TCT CCT TGC TCA TCA CCA TTA- 3'   |               |

**Supplemental Table S2:** Confirmation of primer specificity for sequencing, validation using viral stocks from WHO reference laboratory. The % identity was confirmed using NCIB BlastNT and the accession number of the top hit given.

| Virus Stock | Segment | % identity | Accession |
|-------------|---------|------------|-----------|
| BATV        | S       | 100        | X73464    |
|             | M       | 99.77      | JX846596  |
|             | L       | 99.86      | JX846597  |
| BUNV        | S       | 95.59      | D00353    |
|             | M       | 97.34      | MY091919  |
|             | L       | 99.71      | X14383    |

|      |   |       |          |
|------|---|-------|----------|
| NRIV | S | 99.77 | JX857316 |
|      | M | 99.75 | KC608153 |
|      | L | 100   | KC608152 |

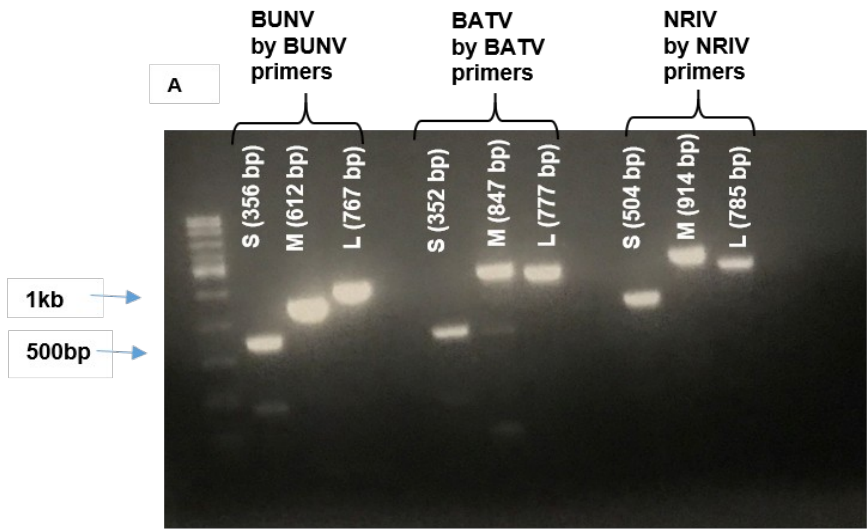

**Figure S1:** 1% agarose gels showing amplification and cross-amplification of PCR primers to BUNV, BATV, and NRIV gene segments. **A.** Amplification by homologous primers. **B.** Comparison between amplification of NRIV genome segments by homologous primers and its parental genome segment primers, **C.** Comparison between amplification of BUNV (S, L) and BATV (M) genome segments by homologous primers and by NRIV primers.

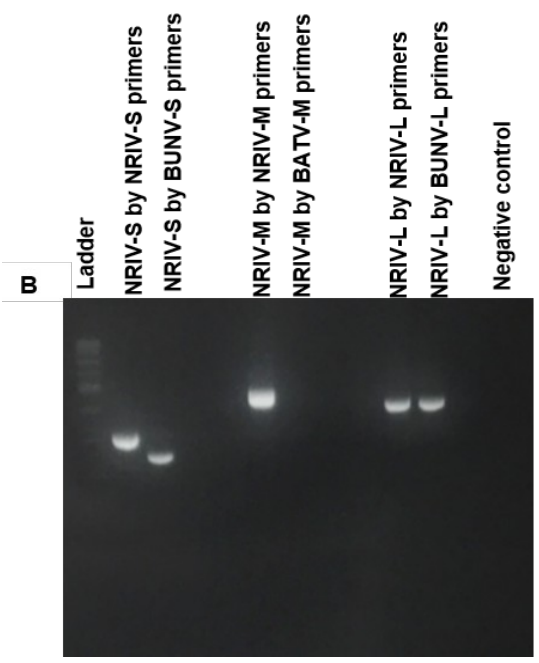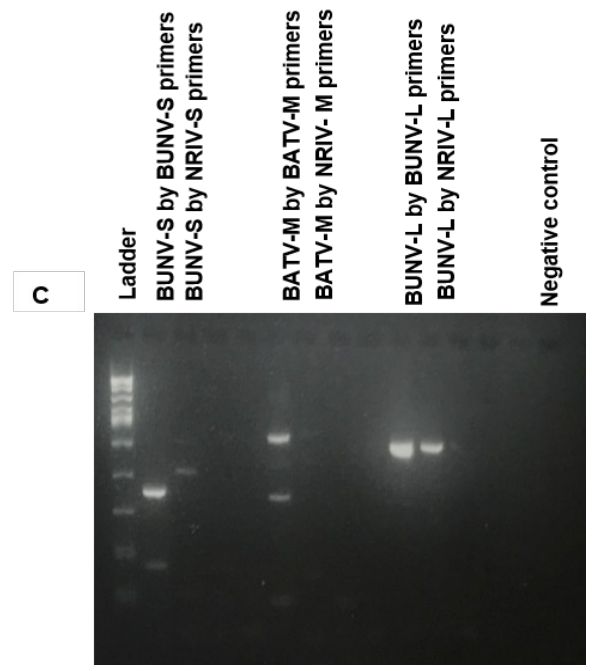

**Supplemental Figure S2:** Visualization on 2% agarose gel of DNA bands for amplified regions of BUNV and BATV S, M, L segments of these 7 samples.

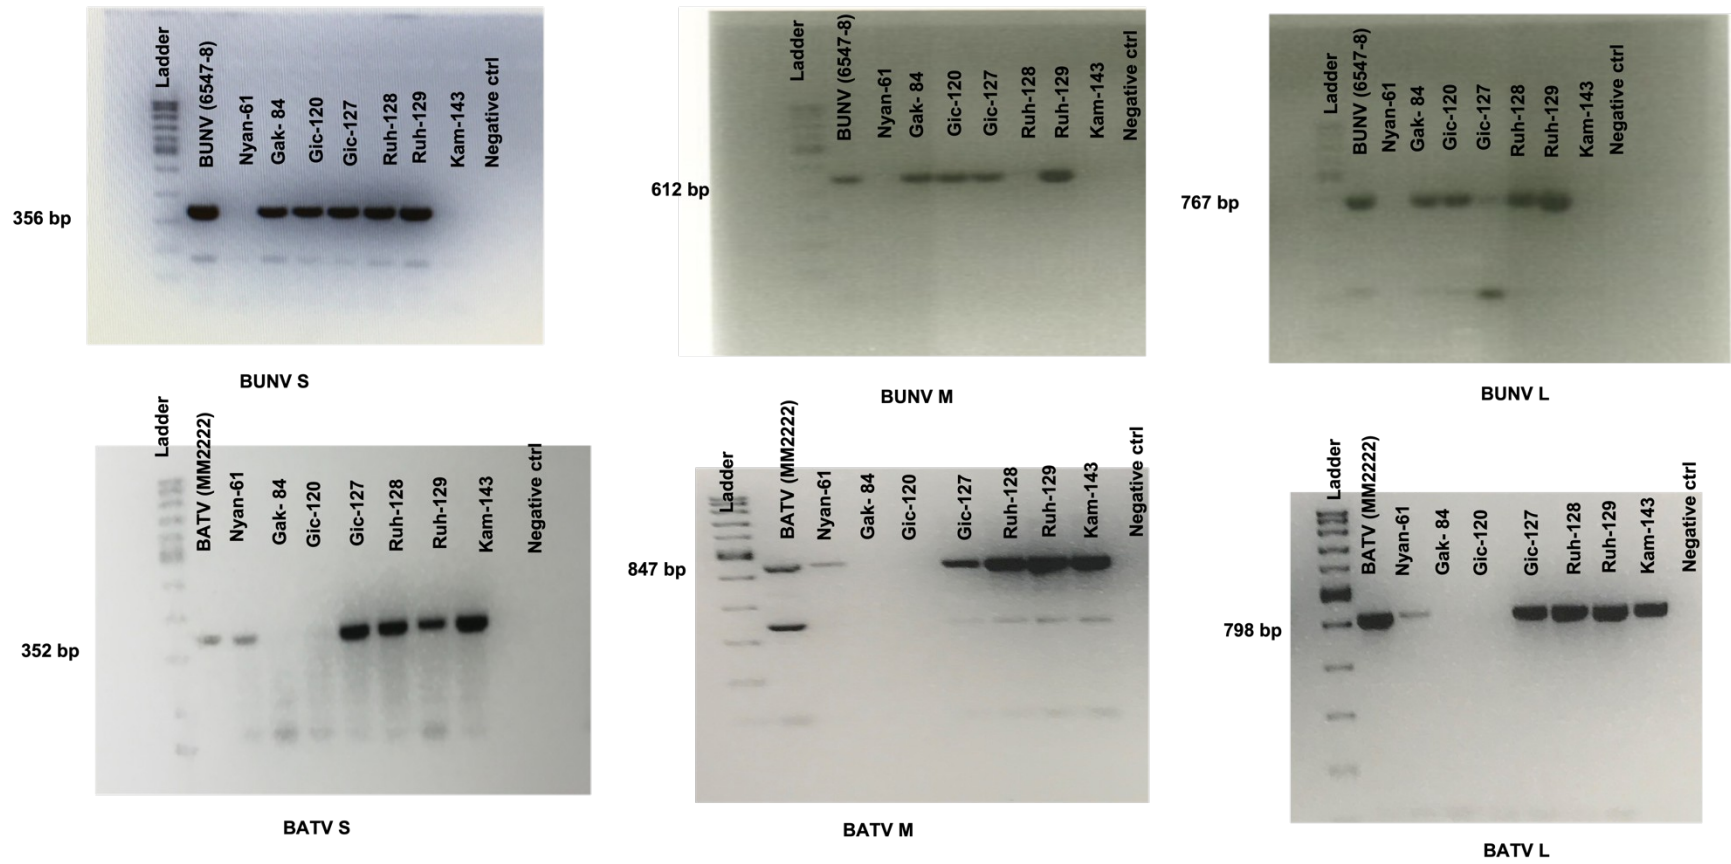

**Table S3: Demographics of the sample population.**

| Samples categories      |                   | Total number of samples collected | RVF positive samples (% positive of demographic category) |             |
|-------------------------|-------------------|-----------------------------------|-----------------------------------------------------------|-------------|
| Overall prevalence      |                   | 185                               | 56 (30.27%)                                               |             |
| Species                 | Cattle            | 157                               | 44 (28.02%)                                               |             |
|                         | Goats             | 28                                | 12 (48.85%)                                               |             |
| Sex                     | Female            | 181                               | 55 (30.38%)                                               |             |
|                         | Male              | 4                                 | 1 (25%)                                                   |             |
| Type of farm            | Family            | 147                               | 41 (27.89%)                                               |             |
|                         | Commercial        | 38                                | 15 (39.47%)                                               |             |
| Breeds (cattle)         | Local             | 16                                | 6 (37.5%)                                                 |             |
|                         | Crossed           | 102                               | 30 (29.41%)                                               |             |
|                         | Exotic            | 39                                | 8 (20.51%)                                                |             |
| Clinical symptoms       | Abortion          | 157                               | 46 (29.29%)                                               |             |
|                         | Hemorrhagic fever | 15                                | 15 (100%)                                                 |             |
| Geographic distribution | Eastern province  | Ngoma                             | 41                                                        | 10 (24.39%) |
|                         |                   | Kirehe                            | 32                                                        | 7 (21.87%)  |
|                         |                   | Kayonza                           | 18                                                        | 6 (33.33%)  |
|                         |                   | Gatsibo                           | 28                                                        | 12 (42.85%) |
|                         |                   | Rwamagana                         | 5                                                         | 4 (4/5)     |
|                         | Southern province | Ruhango                           | 17                                                        | 9 (52.94%)  |
|                         |                   | Kamonyi                           | 15                                                        | 4 (26.66%)  |
|                         |                   | Muhanga                           | 3                                                         | -           |
|                         |                   | Nyanza                            | 5                                                         | -           |
|                         |                   | Gisagara                          | 1                                                         | 1 (1/1)     |
|                         | Northern province | Gakenke                           | 5                                                         | -           |
|                         |                   | Gicumbi                           | 10                                                        | -           |
|                         | Western province  | Ngororero                         | 1                                                         | 1 (1/1)     |
|                         |                   | Rusizi                            | 1                                                         | 1 (1/1)     |
| Kigali city             | Gasabo            | 3                                 | 1 (1/3)                                                   |             |

**Table S4:** BLAST results for sequenced segments of positive samples.

| <b>Virus</b> | <b>Sample ID</b> | <b>Segment primer</b> | <b>GenBank Accession #</b> |
|--------------|------------------|-----------------------|----------------------------|
| <b>BUNV</b>  | 84               | S                     | MT043345                   |
|              |                  | M                     | MT022496                   |
|              |                  | L                     | MT022495                   |
|              | 120              | S                     | MT043346                   |
|              |                  | M                     | MT022499                   |
|              |                  | L                     | MT022498                   |
|              | 127              | S                     | MT043347                   |
|              |                  | M                     | MT022501                   |
|              |                  | L                     | MT022500                   |
|              | 129              | S                     | MT022506                   |
|              |                  | M                     | MT022505                   |
|              |                  | L                     | MT022504                   |
|              | 128              | S                     | MT043348                   |
|              |                  | M                     | MT022503                   |
|              |                  | L                     | MT022502                   |
| 106          | M                | MT022497              |                            |
| 132          | M                | MT022507              |                            |
| 167          | S                | MT043349              |                            |
| <b>BATV</b>  | 198              | S                     | MT022516                   |
|              | 144              | M                     | MT022515                   |
|              | 132              | M                     | MT022493                   |
|              | 127              | S                     | MT022508                   |
|              | 109              | S*                    | N/A                        |
|              |                  | M                     | MT022494                   |
|              | 143              | S                     | MT022514                   |
|              |                  | M                     | MT022513                   |
|              | 128              | S                     | MT022510                   |
|              |                  | M                     | MT022509                   |
|              | 106              | M                     | MT022492                   |
|              | 129              | S                     | MT022512                   |
|              |                  | M                     | MT022511                   |

\*Only FWD sequence was able to be obtained due to sample volume depletion. BLAST top hit JX846595.1 with 99.68% identity. FWD sequence available upon request.
